# Supplementary material for: The Hong Kong Grocery Shopping Dialog Task (HK-GSDT): A Quick Screening Test for Neurocognitive Disorders
Source: Int J Environ Res Public Health. 2022 Oct 15;19(20):13302. doi: 10.3390/ijerph192013302 (PMC9603616; doi:10.3390/ijerph192013302)
Supplement: Supplementary file 1 [file ijerph-19-13302-s001.zip › ijerph-1949129-supplementary.pdf]

The Hong Kong Grocery Shopping Dialog Task (HK-GSDT):  
A Quick Screening Test for NCDs

## Supplementary Materials

### 1. Supplementary Tables

**Table S1.** Areas under the ROC curves (and 95% confidence intervals) for different tests to discriminate between various cognitive health conditions

|                                  | HK-GSDT              | 5-min<br>MoCA        | full version<br>MoCA | HKLLT                | AD8                  |
|----------------------------------|----------------------|----------------------|----------------------|----------------------|----------------------|
| M-NCD vs. m-NCD and normal aging | .89***<br>[.83, .96] | .91***<br>[.87, .95] | .89***<br>[.84, .94] | .92***<br>[.87, .97] | .62*<br>[.52, .72]   |
| M-NCD vs. m-NCD                  | .81***<br>[.72, .91] | .88***<br>[.80, .95] | .85***<br>[.76, .93] | .90***<br>[.82, .98] | .41<br>[.29, .54]    |
| m-NCD vs. normal aging           | .67**<br>[.57, .77]  | .57<br>[.48, .67]    | .61*<br>[.52, .70]   | .69**<br>[.60, .77]  | .74***<br>[.65, .82] |
| normal aging vs. m-/M-NCD        | .79***<br>[.72, .85] | .75***<br>[.68, .81] | .76***<br>[.70, .82] | .81***<br>[.75, .86] | .68***<br>[.62, .75] |

*Note.* \* Asymptotic significance  $p < .05$ , \*\*  $p < .01$ , \*\*\*  $p < .001$ ; a larger area under the ROC curve indicates a better performance on discriminating between cognitive conditions. HK-GSDT = Hong Kong Grocery Shopping Dialog Test; MoCA = Montreal Cognitive Assessment Hong Kong Version; HKLLT = Hong Kong List Learning Test (2<sup>nd</sup> Edition); AD8 = Eight-item Interview to Differentiate Aging and Dementia.

**Table S2.** The goodness-of-fit indices of the multinomial logistic regression models that predict cognitive health conditions

| Regression models <sup>\$</sup>      | Goodness-of-fit indices |        |                   |                           | Model comparison <sup>#</sup>            |
|--------------------------------------|-------------------------|--------|-------------------|---------------------------|------------------------------------------|
|                                      | AIC                     | BIC    | -2 log-likelihood | pseudo $R^2$ <sup>*</sup> |                                          |
| Model 1: Demographics (D.)           | 386.88                  | 421.20 | 370.88            | .35                       | Model 2 vs. Model 1:                     |
| Model 2: D. + HK-GSDT                | 375.23                  | 418.11 | 355.23            | .47                       | $\chi^2 = 56.15$ , $df = 2$ , $p < .001$ |
| Model 3: D. + MoCA (5-min)           | 375.94                  | 418.84 | 355.94            | .49                       | Model 4 vs. Model 3:                     |
| Model 4: D. + MoCA (5-min) + HK-GSDT | 365.96                  | 417.42 | 341.96            | .52                       | $\chi^2 = 12.86$ , $df = 2$ , $p = .002$ |
| Model 5: D. + MoCA (full)            | 383.62                  | 426.37 | 363.62            | .46                       | Model 6 vs. Model 5:                     |
| Model 6: D. + MoCA (full) + HK-GSDT  | 372.84                  | 424.14 | 348.84            | .50                       | $\chi^2 = 18.94$ , $df = 2$ , $p < .001$ |
| Model 7: D. + HKLLT                  | 356.36                  | 399.24 | 336.36            | .53                       | Model 8 vs. Model 7:                     |
| Model 8: D. + HKLLT + HK-GSDT        | 339.94                  | 391.40 | 315.94            | .57                       | $\chi^2 = 23.19$ , $df = 2$ , $p < .001$ |
| Model 9: D. + AD8                    | 428.50                  | 471.39 | 408.50            | .37                       | Model 10 vs. Model 9:                    |
| Model 10: D. + AD8 + HK-GSDT         | 379.81                  | 431.26 | 355.81            | .49                       | $\chi^2 = 56.82$ , $df = 2$ , $p < .001$ |

*Note.* <sup>\$</sup> The outcome variable in these models was cognitive health condition as a categorical variable (normal aging, m-NCD, or M-NCD); <sup>\*</sup> pseudo  $R^2$  was Nagelkerke  $R^2$ ; <sup>#</sup> model comparison was conducted using likelihood ratio test; HK-GSDT = Hong Kong Grocery Shopping Dialog Test; MoCA = Montreal Cognitive Assessment Hong Kong Version; HKLLT = Hong Kong List Learning Test (2<sup>nd</sup> Edition); AD8 = Eight-item Interview to Differentiate Aging and Dementia.

## 2. Supplementary Figures

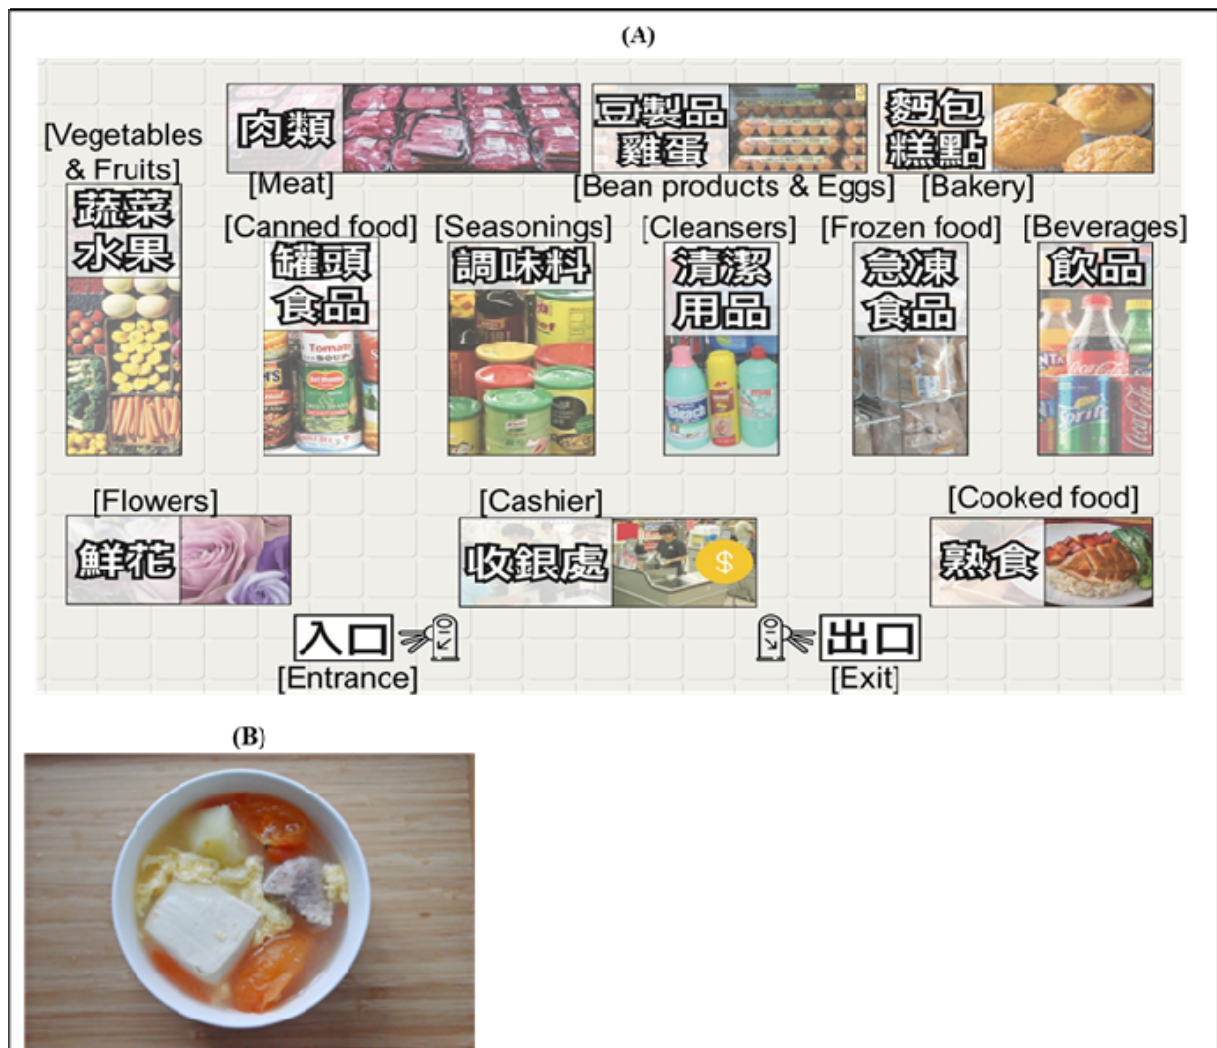

**Figure S1.** Images used in the Hong Kong Grocery Shopping Dialog Task (HK-GSDT). Panel (A) displays the layout of a hypothetical grocery store. Panel (B) is the picture of a traditional Chinese soup, which is made with tomatoes, tofu, eggs, pork, white radishes, salt, and water.

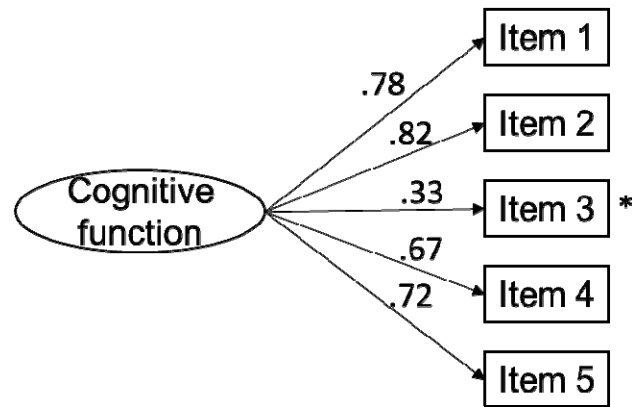

**Figure S2.** Factor structure of the five items in the Hong Kong Grocery Shopping Dialog Task (HK-GSDT). \* The score on Item 3 was reverse coded. The numbers on the arrows are factor loadings.
